# Supplementary material
Source: PubMed Central journal article supplement (PMC2952287)
Supplement: NIHMS235920-supplement-Supplementary_Data.pdf [file NIHMS235920-supplement-Supplementary_Data.pdf]

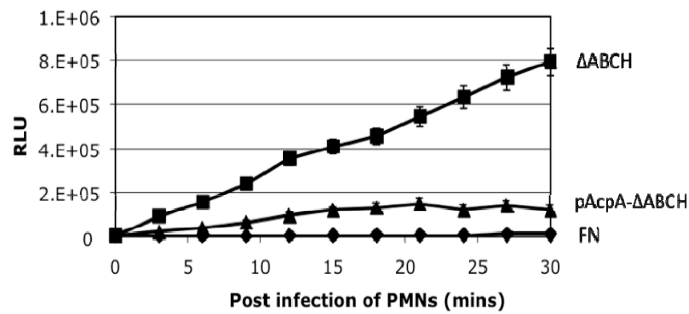

**Supplemental Figure-1.** Neutrophils ( $10^6$ /well) were added to human serum-coated 96-well microtiter plates in HBSS containing 10 mM glucose, 1% human serum albumin and 50 micromolar luminol (Invitrogen, Carlsbad, CA) and left on ice for 15 min. Subsequently, serum opsonized *F. novicida* (FN;  $\blacklozenge$ ),  $\Delta$ ABCH ( $\blacksquare$ ), or pAcpA complemented  $\Delta$ ABCH ( $\blacktriangle$ ) was added at an MOI of  $\sim$ 50:1. The microtiter plate was centrifuged at 400 x g for 2 min at 12<sup>0</sup>C to synchronize the infection. The relative amount of ROS generated by neutrophils over time was detected by measuring the luminescence in an ELISA reader (Spectramax M5, Molecular Devices, Sunnyvale, CA) after warming the cells to 37<sup>0</sup>C.
